# Supplementary material for: Recyclable mesalamine-functionalized magnetic nanoparticles (mesalamine/GPTMS@SiO 2 @Fe 3 O 4 ) for tandem Knoevenagel–Michael cyclocondensation: grinding technique for the synthesis of biologically active 2-amino-4 H -benzo[ b ]pyran derivatives
Source: Royal Society of Chemistry journal article supplement (doi:10.1039/d3ra06560j), 2023-01-01
Supplement: d3ra06560j1.pdf [file d3ra06560j1.pdf]

## Supporting Information

### **A Recyclable Mesalamine-Functionalized on Magnetic Nanoparticles (Mesalamine/GPTMS@SiO<sub>2</sub>@Fe<sub>3</sub>O<sub>4</sub>) for Tandem Knoevenagel–Michael Cyclocondensation: Grinding Technique for the Synthesis of Biologically Active 2-Amino-4*H*-benzo[b]pyran Derivatives**

Mahdiyeh Partovi<sup>1</sup>, Sobhan Rezayati<sup>1</sup>, Ali Ramazani<sup>1,2 \*</sup>, Yavar Ahmadi<sup>3</sup>, Hooman Taherkhani<sup>1</sup>

<sup>1</sup>*Department of Chemistry, Faculty of Science, University of Zanjan, Zanjan 45371-38791, Iran*

<sup>2</sup>*Department of Biotechnology, Research Institute of Modern Biological Techniques (RIMBT), University of Zanjan, Zanjan 45371-38791, Iran*

<sup>3</sup> *Department of Chemistry Education, Farhangian University, P.O. Box 14665-889, Tehran, Iran*

Corresponding author : [aliramazani@znu.ac.ir](mailto:aliramazani@znu.ac.ir); [aliramazani@gmail.com](mailto:aliramazani@gmail.com)

| <b>List of Contents</b>                                                                                                                   | <b>Page</b> |
|-------------------------------------------------------------------------------------------------------------------------------------------|-------------|
| <b>Figure S1.</b> FT-IR spectrum of 2-Amino-7, 7-dimethyl-4-(4-chlorophenyl)-5-oxo-5, 6, 7, 8-tetrahydrobenzo[b]pyran (4b)                | S6          |
| <b>Figure S2.</b> <sup>1</sup> H NMR spectrum of 2-Amino-7, 7-dimethyl-4-(4-chlorophenyl)-5-oxo-5, 6, 7, 8-tetrahydrobenzo[b]pyran (4b)   | S7          |
| <b>Figure S3.</b> <sup>13</sup> C NMR spectrum of 2-Amino-7, 7-dimethyl-4-(4-chlorophenyl)-5-oxo-5, 6, 7, 8-tetrahydrobenzo[b]pyran (4b)  | S8          |
| <b>Figure S4.</b> FT-IR spectrum of 2-Amino-7, 7-dimethyl-4-(4-bromophenyl)-5-oxo-5, 6, 7, 8-tetrahydrobenzo[b]pyran (4c)                 | S9          |
| <b>Figure S5.</b> <sup>1</sup> H NMR spectrum of 2-Amino-7, 7-dimethyl-4-(4-bromophenyl)-5-oxo-5, 6, 7, 8-tetrahydrobenzo[b]pyran (4c)    | S10         |
| <b>Figure S6.</b> <sup>13</sup> C NMR spectrum of 2-Amino-7, 7-dimethyl-4-(4-bromophenyl)-5-oxo-5, 6, 7, 8-tetrahydrobenzo[b]pyran (4c)   | S11         |
| <b>Figure S7.</b> FT-IR spectrum of 2-Amino-7, 7-dimethyl-4-(4-nitrophenyl)-5-oxo-5, 6, 7, 8-tetrahydrobenzo[b]pyran (4e)                 | S12         |
| <b>Figure S8.</b> <sup>1</sup> H NMR spectrum of 2-Amino-7, 7-dimethyl-4-(4-nitrophenyl)-5-oxo-5, 6, 7, 8-tetrahydrobenzo[b]pyran (4e)    | S13         |
| <b>Figure S9.</b> <sup>13</sup> C NMR spectrum of 2-Amino-7, 7-dimethyl-4-(4-nitrophenyl)-5-oxo-5, 6, 7, 8-tetrahydrobenzo[b]pyran (4e)   | S14         |
| <b>Figure S10.</b> FT-IR spectrum of 2-Amino-7, 7-dimethyl-4-(4-methylphenyl)-5-oxo-5, 6, 7, 8-tetrahydrobenzo[b]pyran (4f)               | S15         |
| <b>Figure S11.</b> <sup>1</sup> H NMR spectrum of 2-Amino-7, 7-dimethyl-4-(4-methylphenyl)-5-oxo-5, 6, 7, 8-tetrahydrobenzo[b]pyran (4f)  | S16         |
| <b>Figure S12.</b> <sup>13</sup> C NMR spectrum of 2-Amino-7, 7-dimethyl-4-(4-methylphenyl)-5-oxo-5, 6, 7, 8-tetrahydrobenzo[b]pyran (4f) | S17         |
| <b>Figure S13.</b> FT-IR spectrum of 2-Amino-7, 7-dimethyl-4-(4-fluorophenyl)-5-oxo-5, 6, 7, 8-tetrahydrobenzo[b]pyran (4h)               | S18         |
| <b>Figure S14.</b> <sup>1</sup> H NMR spectrum of 2-Amino-7, 7-dimethyl-4-(4-fluorophenyl)-5-oxo-5, 6, 7, 8-tetrahydrobenzo[b]pyran (4h)  | S19         |
| <b>Figure S15.</b> <sup>13</sup> C NMR spectrum of 2-Amino-7, 7-dimethyl-4-(4-fluorophenyl)-5-oxo-5, 6, 7, 8-tetrahydrobenzo[b]pyran (4h) | S20         |

|                                                                                                                                               |     |
|-----------------------------------------------------------------------------------------------------------------------------------------------|-----|
| <b>Figure S16.</b> FT-IR spectrum of 2-Amino-7, 7-dimethyl-4-(3-nitrophenyl)-5-oxo-5, 6, 7, 8-tetrahydrobenzo[b]pyran (4m)                    | S21 |
| <b>Figure S17.</b> <sup>1</sup> H NMR spectrum of 2-Amino-7, 7-dimethyl-4-(3-nitrophenyl)-5-oxo-5, 6, 7, 8-tetrahydrobenzo[b]pyran (4m)       | S22 |
| <b>Figure S18.</b> <sup>13</sup> C NMR spectrum of 2-Amino-7, 7-dimethyl-4-(3-nitrophenyl)-5-oxo-5, 6, 7, 8-tetrahydrobenzo[b]pyran (4m)      | S23 |
| <b>Figure S19.</b> FT-IR spectrum of 2-Amino-7, 7-dimethyl-4-(2,4-dichlorophenyl)-5-oxo-5, 6, 7, 8-tetrahydrobenzo[b]pyran (4o)               | S24 |
| <b>Figure S20.</b> <sup>1</sup> H NMR spectrum of 2-Amino-7, 7-dimethyl-4-(2,4-dichlorophenyl)-5-oxo-5, 6, 7, 8-tetrahydrobenzo[b]pyran (4o)  | S25 |
| <b>Figure S21.</b> <sup>13</sup> C NMR spectrum of 2-Amino-7, 7-dimethyl-4-(2,4-dichlorophenyl)-5-oxo-5, 6, 7, 8-tetrahydrobenzo[b]pyran (4o) | S26 |

***2-Amino-7, 7-dimethyl-4-(4-chlorophenyl)-5-oxo-5, 6, 7, 8-tetrahydrobenzo[b]pyran (4b)***

FT-IR (KBr,  $\text{cm}^{-1}$ ): 3379, 3182, 2958, 2188, 1674, 1589, 1459, 1367, 1215, 1094, 1013, 828, 616, 521.  $^1\text{H-NMR}$  (250 MHz,  $\text{DMSO-d}_6$ ):  $\delta$  7.33 (d, 2H,  $J = 7.5$  MHz, Ar-H), 7.19 (d, 2H,  $J = 8.25$  MHz, Ar-H), 7.05 (s, 2H,  $\text{NH}_2$ ), 4.65 (s, 1H, C-H), 2.19-2.41 (m, 2H,  $\text{CH}_2$ ), 2.02-2.08 (m, 2H,  $\text{CH}_2$ ), 1.01 (s, 3H, Me), 0.95 (s, 3H, Me).  $^{13}\text{C-NMR}$  (62.5 MHz,  $\text{DMSO-d}_6$ ):  $\delta$  18.9, 27.3, 28.7, 32.1, 33.1, 38.9, 50.3, 56.4, 56.7, 111.8, 119.5, 128.0, 129.1, 131.8, 132.2, 133.4, 141.1, 159.1, 163.7, 196.0.

***2-Amino-7, 7-dimethyl-4-(4-bromophenyl)-5-oxo-5, 6, 7, 8-tetrahydrobenzo[b]pyran (4c)***

FT-IR (KBr,  $\text{cm}^{-1}$ ): 3396, 3324, 3212, 2960, 2199, 1679, 1604, 1604, 1371, 1214, 1036, 839, 695.  $^1\text{H-NMR}$  (250 MHz,  $\text{DMSO-d}_6$ ):  $\delta$  6.91-7.84 (m, 6H, Ar-H,  $\text{NH}_2$ ), 4.16 (s, 1H, C-H), 2.10-2.48 (m, 4H,  $2\text{CH}_2$ ), 0.92 (s, 3H, Me), 1.00 (s, 3H, Me).  $^{13}\text{C-NMR}$  (62.5 MHz,  $\text{DMSO-d}_6$ ):  $\delta$  31.0, 31.7, 32.2, 32.9, 35.6, 47.1, 50.4, 56.5, 114.6, 129.2, 129.9, 131.0, 132.5, 133.1, 158.9, 160.7, 196.6.

***2-Amino-7, 7-dimethyl-4-(4-nitrophenyl)-5-oxo-5, 6, 7, 8-tetrahydrobenzo[b]pyran (4e)***

FT-IR (KBr,  $\text{cm}^{-1}$ ): 3405, 3321, 3185, 2963, 2192, 1682, 1652, 1631, 1594, 1521, 1349, 1215, 1033, 827.  $^1\text{H-NMR}$  (250 MHz,  $\text{DMSO-d}_6$ ):  $\delta$  7.15-8.25 (m, 6H, Ar-H,  $\text{NH}_2$ ), 4.34 (s, 1H, C-H), 3.03-3.39 (m, 2H,  $\text{CH}_2$ ), 2.06-2.20 (m, 2H,  $\text{CH}_2$ ), 1.13 (s, 3H, Me), 1.01 (s, 3H, Me).  $^{13}\text{C-NMR}$  (62.5 MHz,  $\text{DMSO-d}_6$ ):  $\delta$  22.9, 24.2, 27.7, 31.8, 45.8, 52.0, 53.1, 114.7, 115.3, 124.3, 128.3, 146.2, 154.5, 159.0.

***2-Amino-7, 7-dimethyl-4-(4-methylphenyl)-5-oxo-5, 6, 7, 8-tetrahydrobenzo[b]pyran (4f)***

FT-IR (KBr,  $\text{cm}^{-1}$ ): 3383, 3316, 3208, 3026, 2963, 2192, 1682, 1654, 1605, 1510, 1410, 1368, 1250, 1214, 1036, 845, 770.  $^1\text{H-NMR}$  (250 MHz,  $\text{DMSO-d}_6$ ):  $\delta$  6.93-8.42 (m, 6H, Ar-H,  $\text{NH}_2$ ), 4.11 (s, 1H, C-H), 2.21 (s, 3H, Me), 2.36-2.46 (m, 4H,  $2\text{CH}_2$ ), 1.00 (s, 3H, Me), 0.93 (s, 3H, Me).  $^{13}\text{C-NMR}$  (62.5 MHz,  $\text{DMSO-d}_6$ ):  $\delta$  14.5, 22.8, 24.2, 27.7, 31.1, 45.9, 52.9, 53.6, 108.2, 115.5, 125.5, 127.1, 140.1, 154.4, 158.6, 191.6.

***2-Amino-7, 7-dimethyl-4-(4-fluorophenyl)-5-oxo-5, 6, 7, 8-tetrahydrobenzo[b]pyran (4h)***

FT-IR (KBr,  $\text{cm}^{-1}$ ): 3431, 2230, 1635, 1595, 1507, 1416, 1367, 1304, 1244, 1165, 838, 616, 529, 438.  $^1\text{H-NMR}$  (250 MHz,  $\text{DMSO-d}_6$ ):  $\delta$  6.98-8.50 (m, 6H, Ar-H,  $\text{NH}_2$ ), 4.17 (s, 1H, C-H), 2.19-2.51 (m, 2H,  $\text{CH}_2$ ), 2.04-2.10 (m, 2H,  $\text{CH}_2$ ), 1.0 (s, 3H, Me), 0.92 (s, 3H, Me).  $^{13}\text{C-NMR}$  (62.5

MHz, DMSO-d<sub>6</sub>):  $\delta$  27.3, 28.2, 28.7, 32.2, 35.3, 47.1, 50.4, 115.2, 115.6, 117.2, 117.5, 129.5, 134.0, 141.3, 160.6, 162.9, 196.1.

***2-Amino-7, 7-dimethyl-4-(3-nitrophenyl)-5-oxo-5, 6, 7, 8-tetrahydrobenzo[b]pyran (4m)***

FT-IR (KBr, cm<sup>-1</sup>): 3396, 3323, 3212, 2959, 2190, 1682, 1654, 1604, 1489, 1366, 1250, 1214, 1034, 847, 561. <sup>1</sup>H-NMR (250 MHz, DMSO-d<sub>6</sub>):  $\delta$  7.13-7.90 (m, 4H, Ar-H), 7.02 (s, 2H, NH<sub>2</sub>), 4.32 (s, 1H, CH), 2.09-2.47 (m, 4H, 2CH<sub>2</sub>), 1.00 (s, 3H, Me), 0.98 (s, 3H, Me). <sup>13</sup>C-NMR (62.5 MHz, DMSO-d<sub>6</sub>):  $\delta$  26.6, 28.3, 29.5, 32.5, 35.3, 50.7, 55.2, 59.4, 102.8, 104.3, 110.6, 113.6, 128.8, 140.4, 145.0, 149.7, 157.7, 194.7.

***2-Amino-7, 7-dimethyl-4-(2,4-dichlorophenyl)-5-oxo-5, 6, 7, 8-tetrahydrobenzo[b]pyran (4o)***

FT-IR (KBr, cm<sup>-1</sup>): 3531, 3364, 3158, 2961, 2191, 1721, 1685, 1609, 1475, 1368, 1216, 1042, 861, 563. <sup>1</sup>H-NMR (250 MHz, DMSO-d<sub>6</sub>):  $\delta$  7.21-7.41 (m, 3H, Ar-H), 7.07 (s, 2H, NH<sub>2</sub>), 5.19 (s, 1H, CH), 2.06-2.51 (m, 4H, 2CH<sub>2</sub>), 0.98 (s, 6H, 2Me). <sup>13</sup>C-NMR (62.5 MHz, DMSO-d<sub>6</sub>):  $\delta$  18.9, 27.3, 28.9, 31.9, 32.7, 50.3, 54.0, 56.4, 110.4, 119.4, 128.9, 129.4, 130.6, 134.6, 136.3, 136.7, 159.9, 164.1, 196.1.

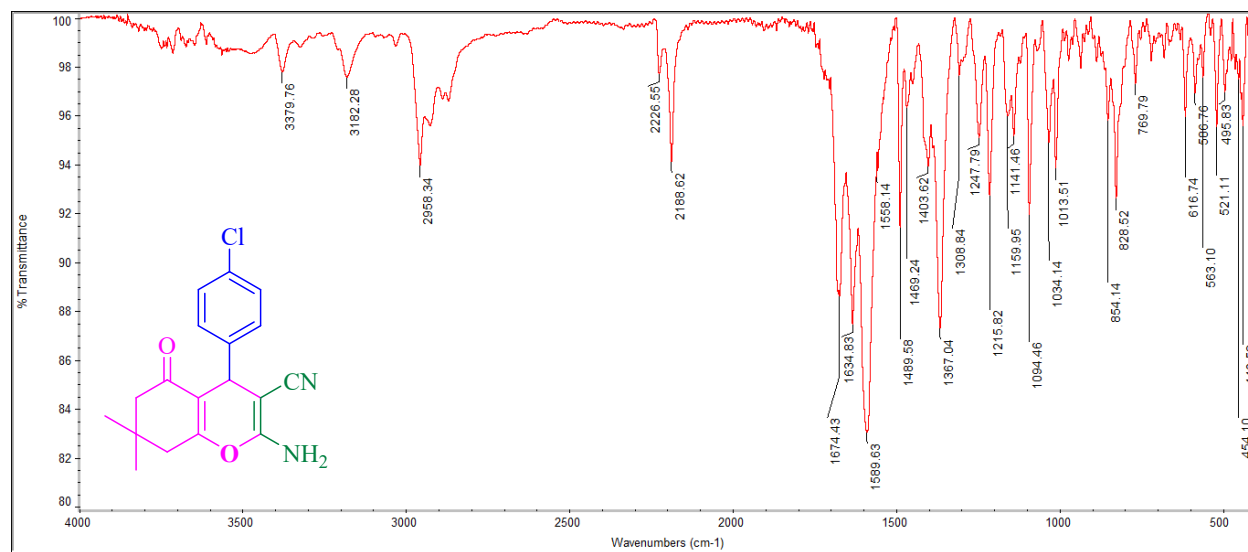

**Figure S1.** FT-IR spectrum of 2-Amino-7,7-dimethyl-4-(4-chlorophenyl)-5-oxo-5,6,7,8-tetrahydrobenzo[b]pyran (4b)

partovi-4ClG6-1402-5-9

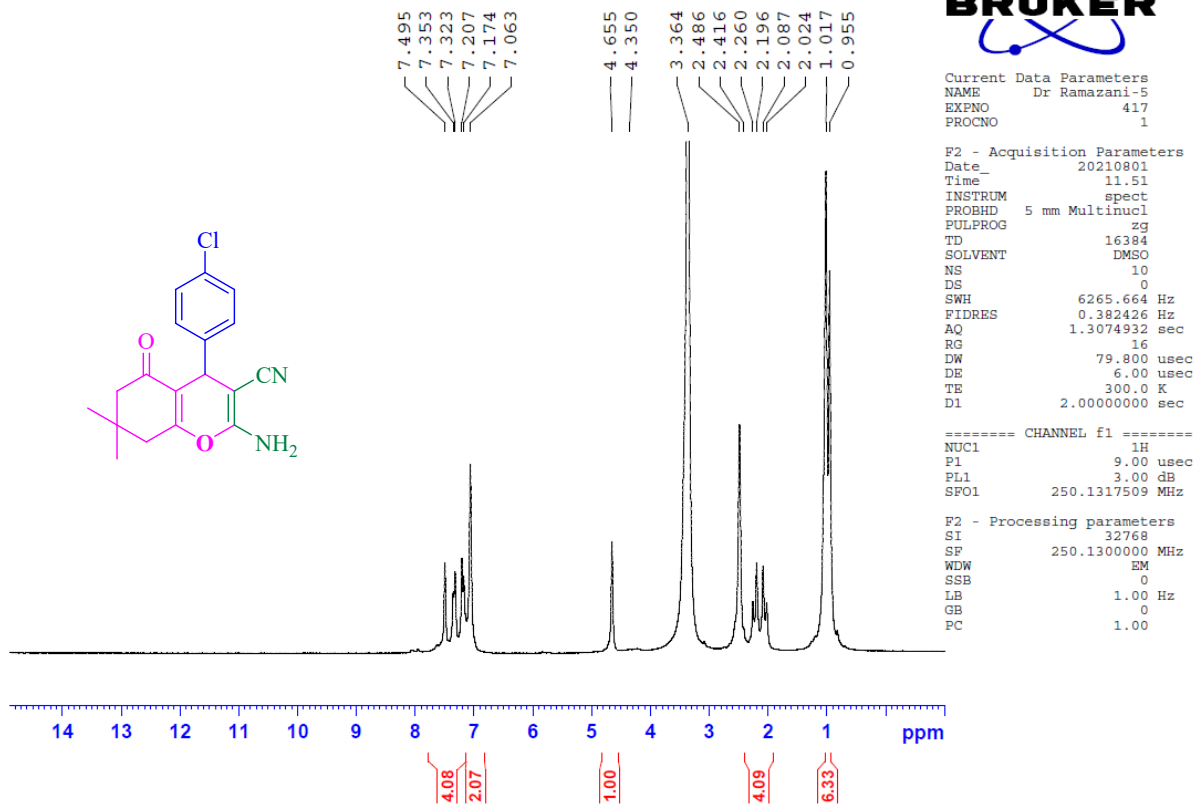

**Figure S2.**  $^1\text{H}$  NMR spectrum of 2-Amino-7,7-dimethyl-4-(4-chlorophenyl)-5-oxo-5,6,7,8-tetrahydrobenzo[b]pyran (4b)

partovi-4Cl66-1402-5-9

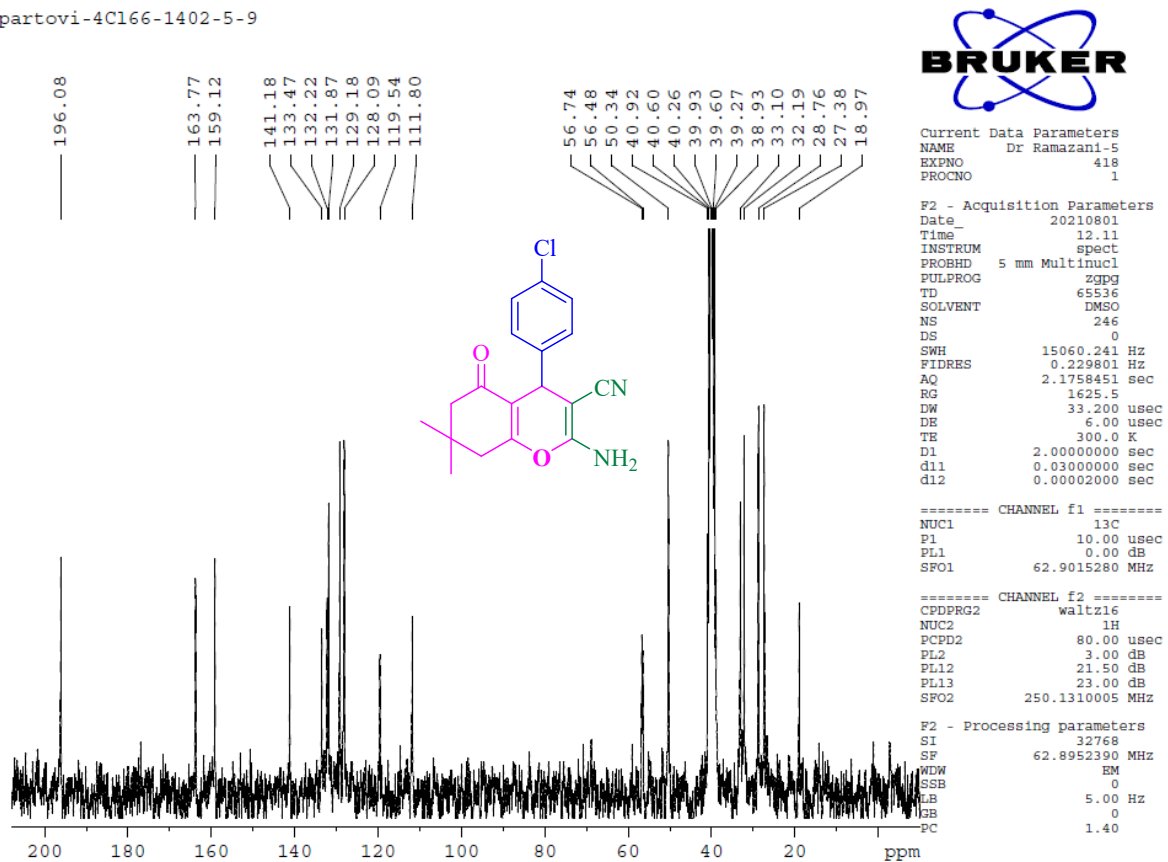

**Figure S3.** <sup>13</sup>C NMR spectrum of 2-Amino-7,7-dimethyl-4-(4-chlorophenyl)-5-oxo-5,6,7,8-tetrahydrobenzo[b]pyran (4b)



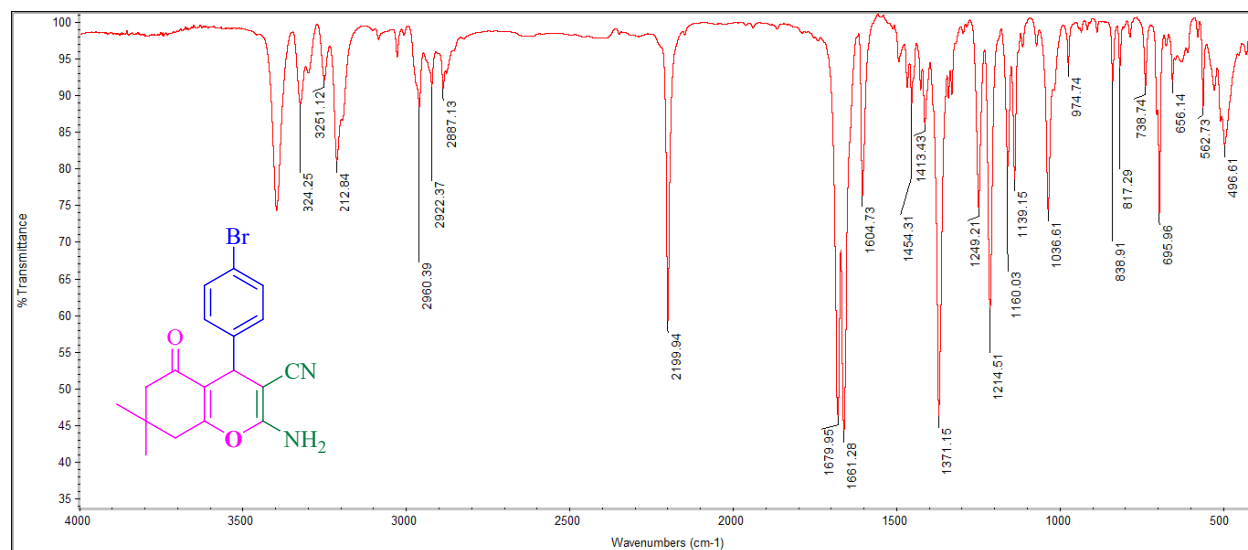

**Figure S4.** FT-IR spectrum of 2-Amino-7,7-dimethyl-4-(4-bromophenyl)-5-oxo-5,6,7,8-tetrahydrobenzo[b]pyran (4c)

Partovi-4-BrGG-1402-5-17

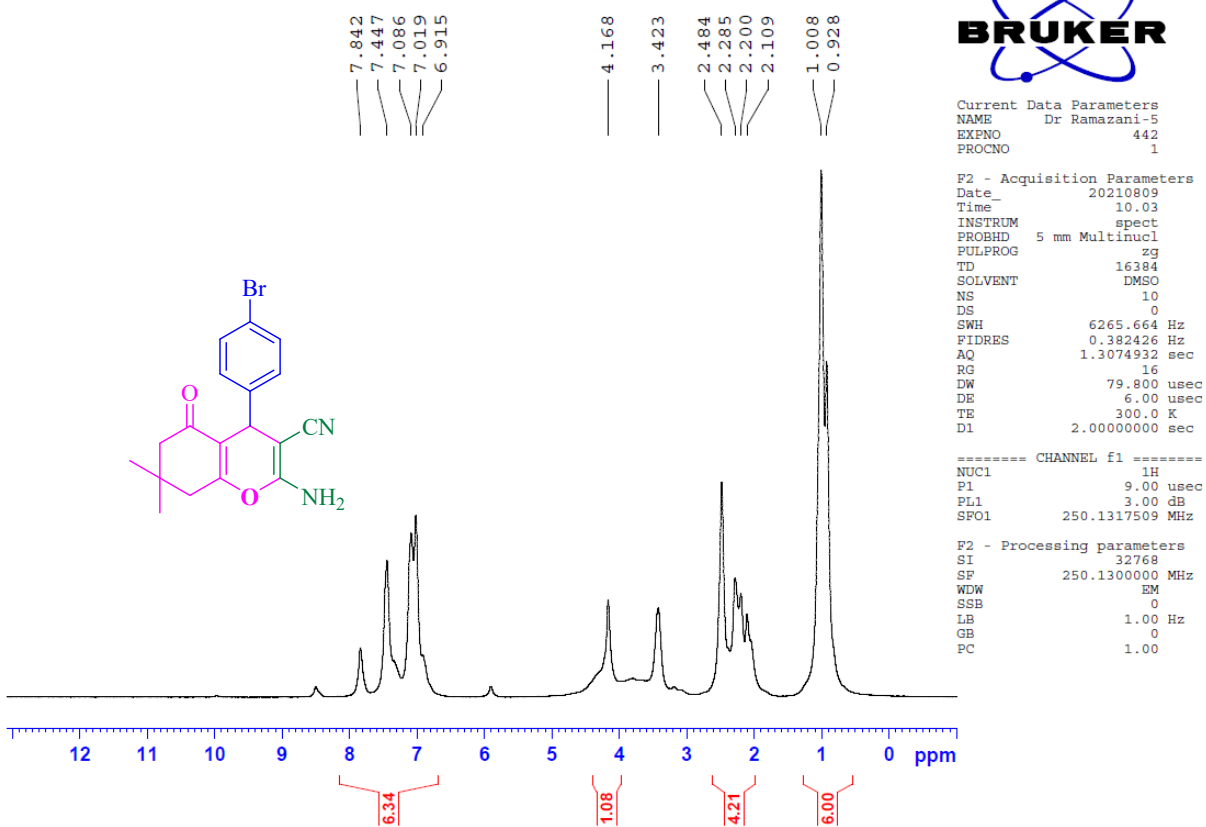

**Figure S5.**  $^1\text{H}$  NMR spectrum of 2-Amino-7,7-dimethyl-4-(4-bromophenyl)-5-oxo-5,6,7,8-tetrahydrobenzo[b]pyran (4c)

Partovi-4-Br-GG-1402-5-17

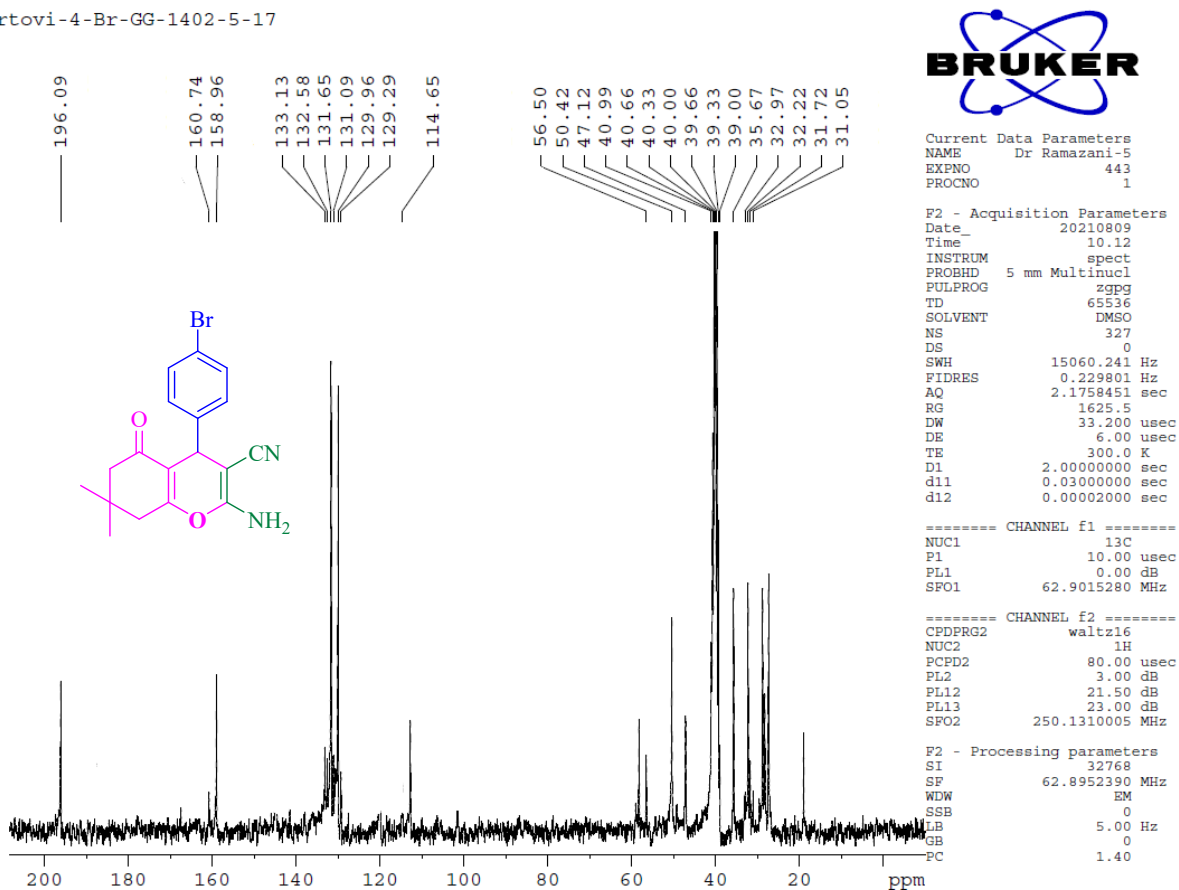

**Figure S6.**  $^{13}\text{C}$  NMR spectrum of 2-Amino-7,7-dimethyl-4-(4-bromophenyl)-5-oxo-5,6,7,8-tetrahydrobenzo[b]pyran (4c)

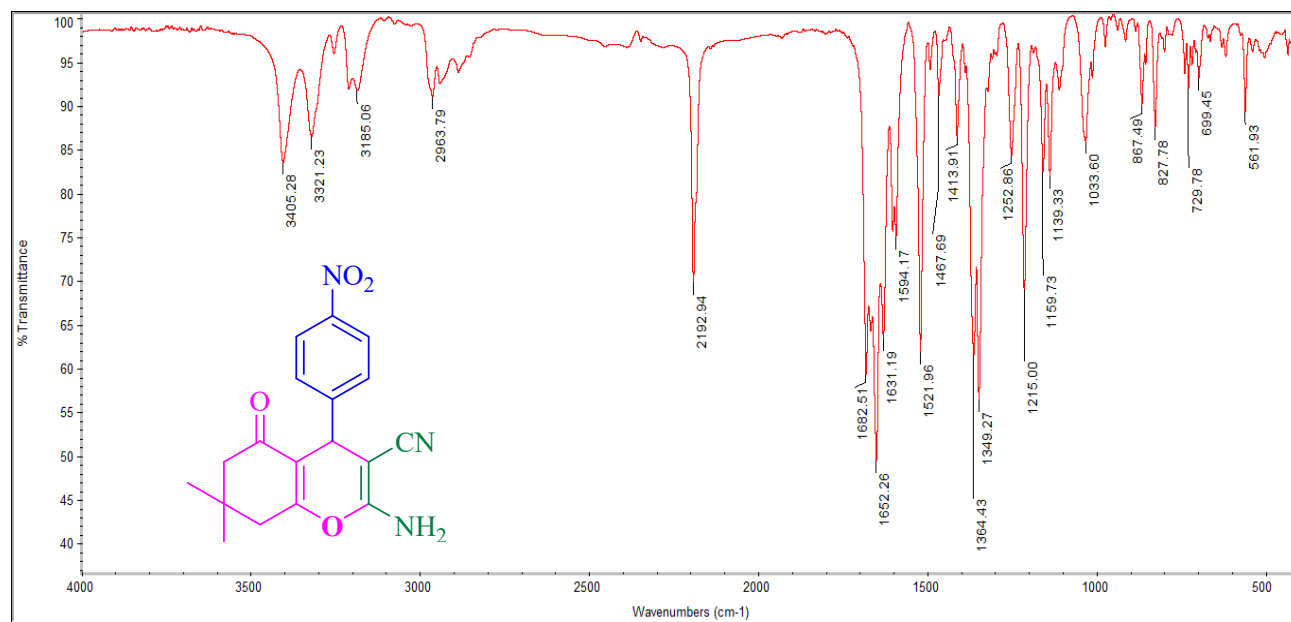

**Figure S7.** FT-IR spectrum of 2-Amino-7,7-dimethyl-4-(4-nitrophenyl)-5-oxo-5,6,7,8-tetrahydrobenzo[b]pyran (4e)

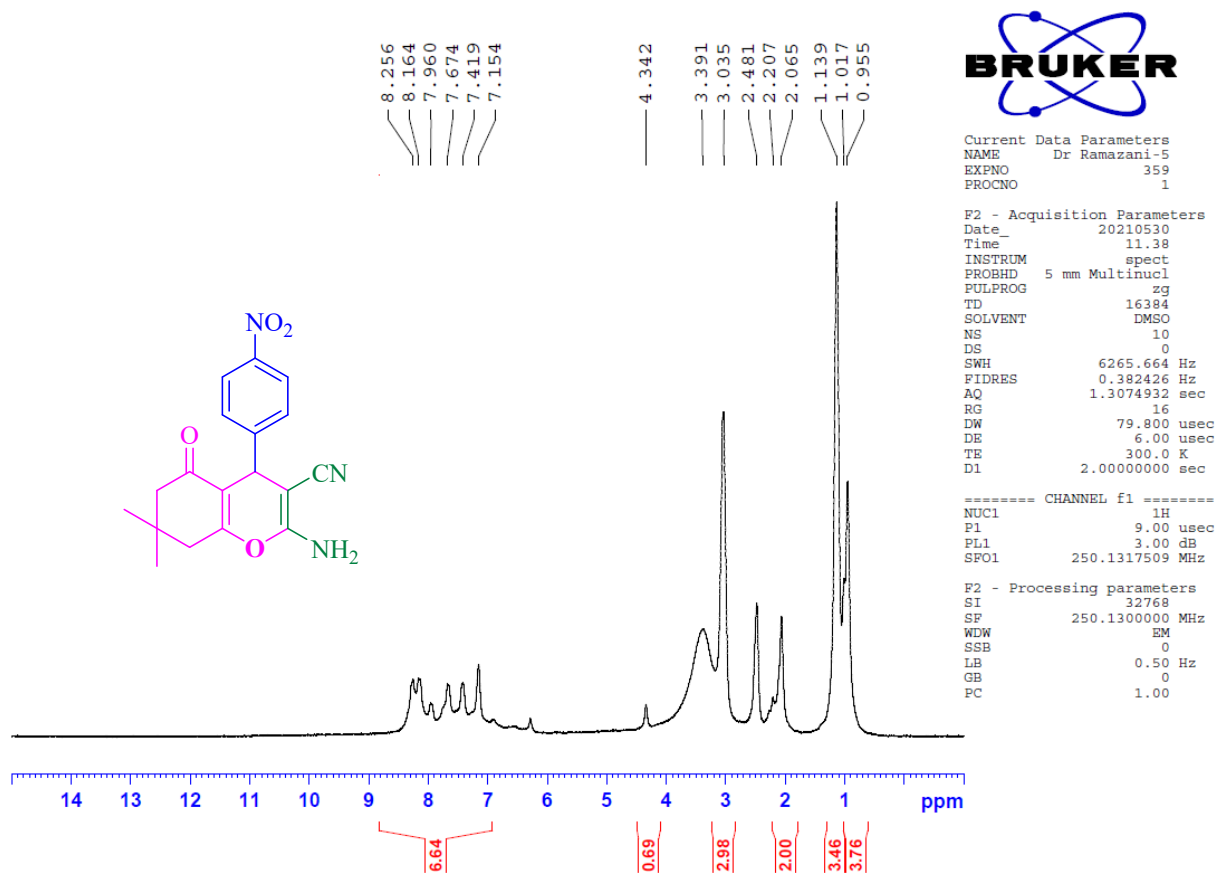

**Figure S8.** <sup>1</sup>H NMR spectrum of 2-Amino-7,7-dimethyl-4-(4-nitrophenyl)-5-oxo-5,6,7,8-tetrahydrobenzo[b]pyran (4e)

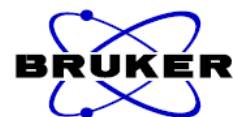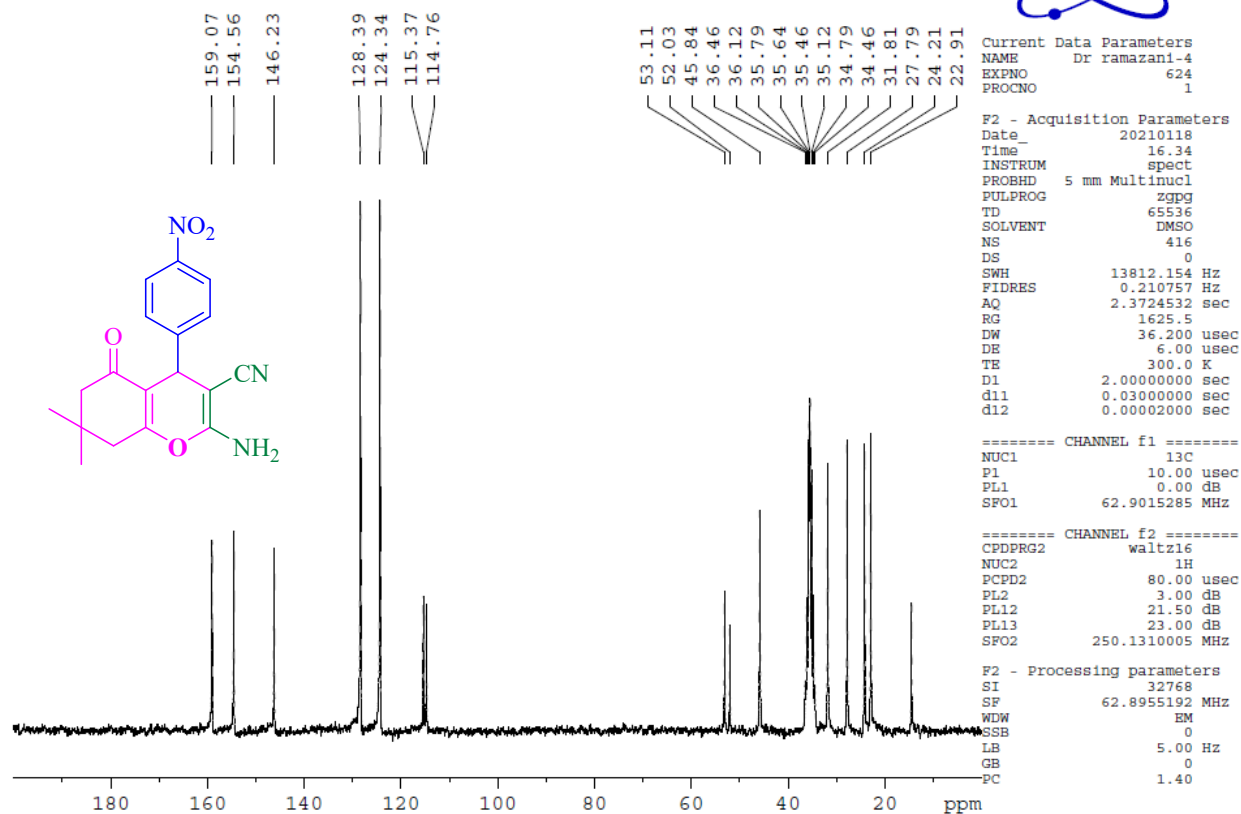

**Figure S9.**  $^{13}\text{C}$  NMR spectrum of 2-Amino-7, 7-dimethyl-4-(4-nitrophenyl)-5-oxo-5, 6, 7, 8-tetrahydrobenzo[b]pyran (4e)

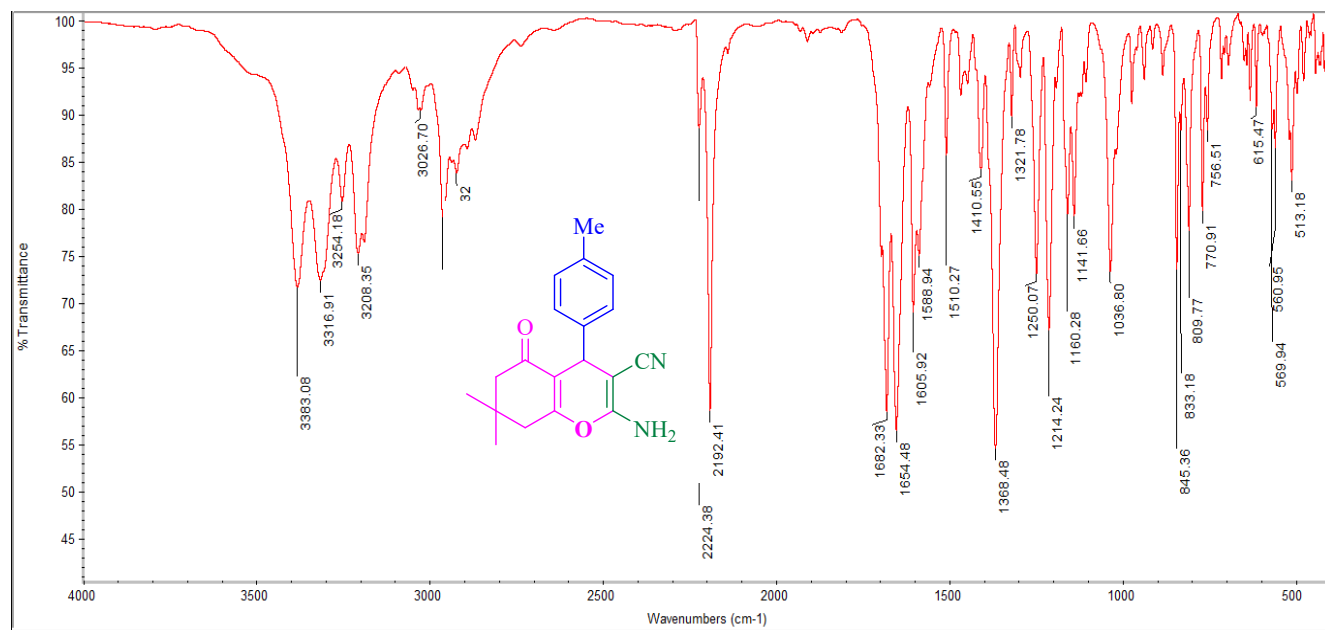

**Figure S10.** FT-IR spectrum of 2-Amino-7,7-dimethyl-4-(4-methylphenyl)-5-oxo-5,6,7,8-tetrahydrobenzo[b]pyran (4f)

Partovi-4Meto GG-1402-5-16

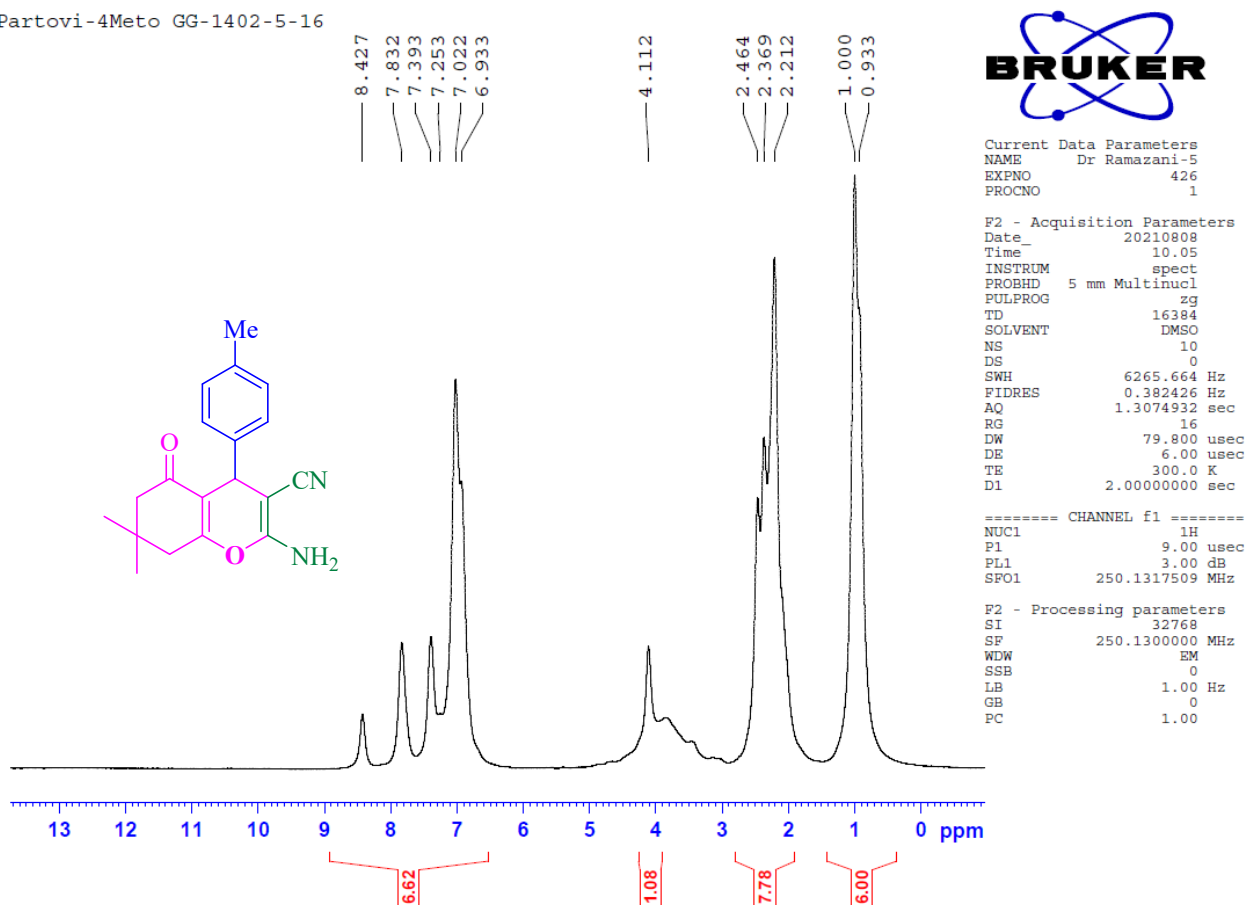

**Figure S11.** <sup>1</sup>H NMR spectrum of 2-Amino-7,7-dimethyl-4-(4-methylphenyl)-5-oxo-5,6,7,8-tetrahydrobenzo[b]pyran (4f)



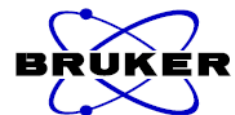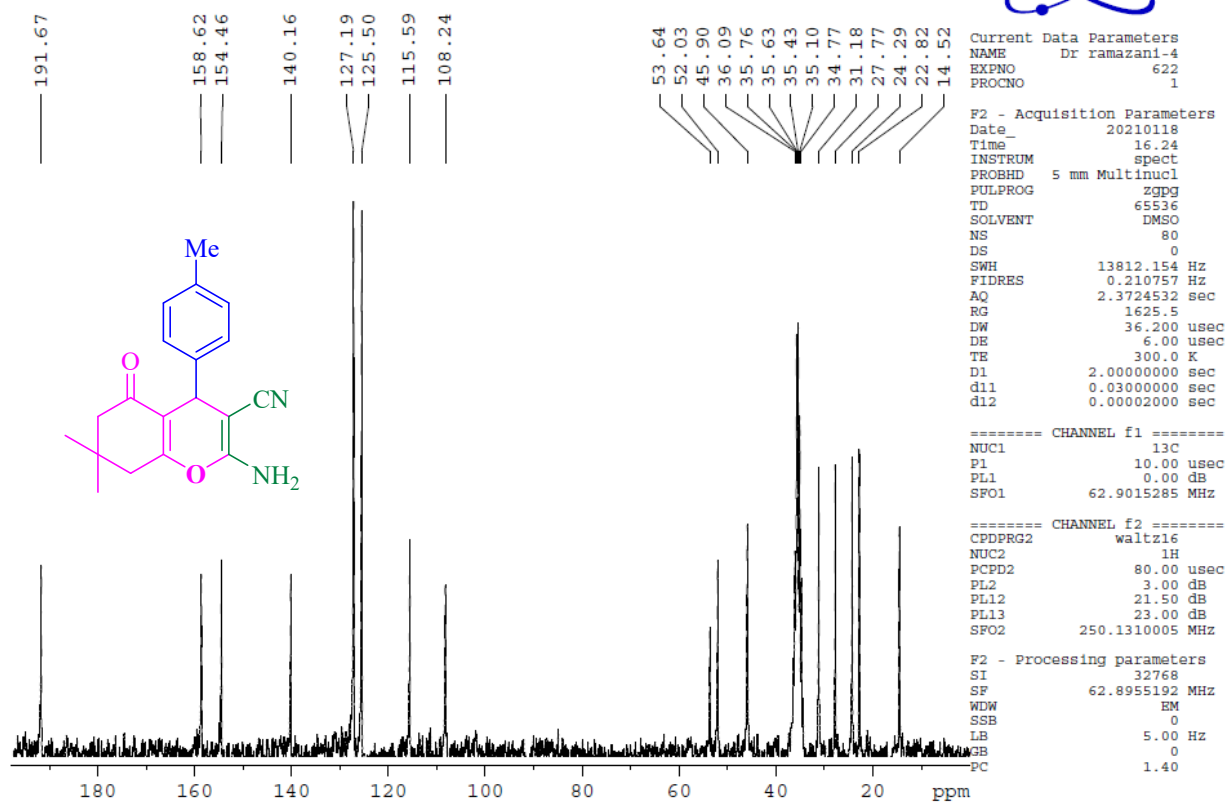

**Figure S12.**  $^{13}\text{C}$  NMR spectrum of 2-Amino-7,7-dimethyl-4-(4-methylphenyl)-5-oxo-5,6,7,8-tetrahydrobenzo[b]pyran (4f)

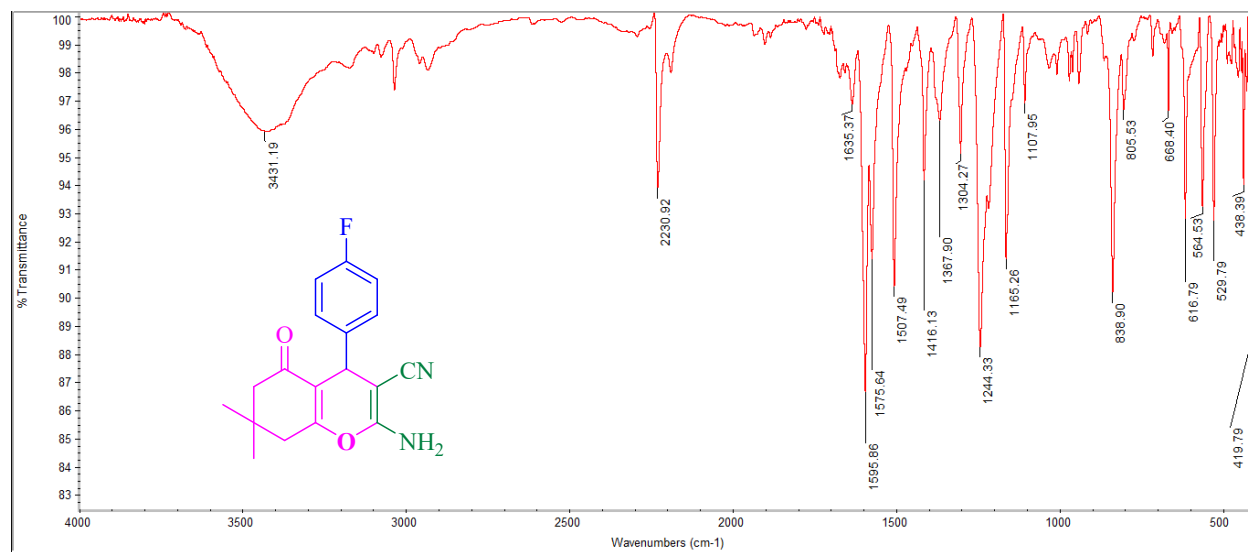

**Figure S13.** FT-IR spectrum of 2-Amino-7,7-dimethyl-4-(4-fluorophenyl)-5-oxo-5,6,7,8-tetrahydrobenzo[b]pyran (4h)

Partovi-4F-GG-1402-5-17

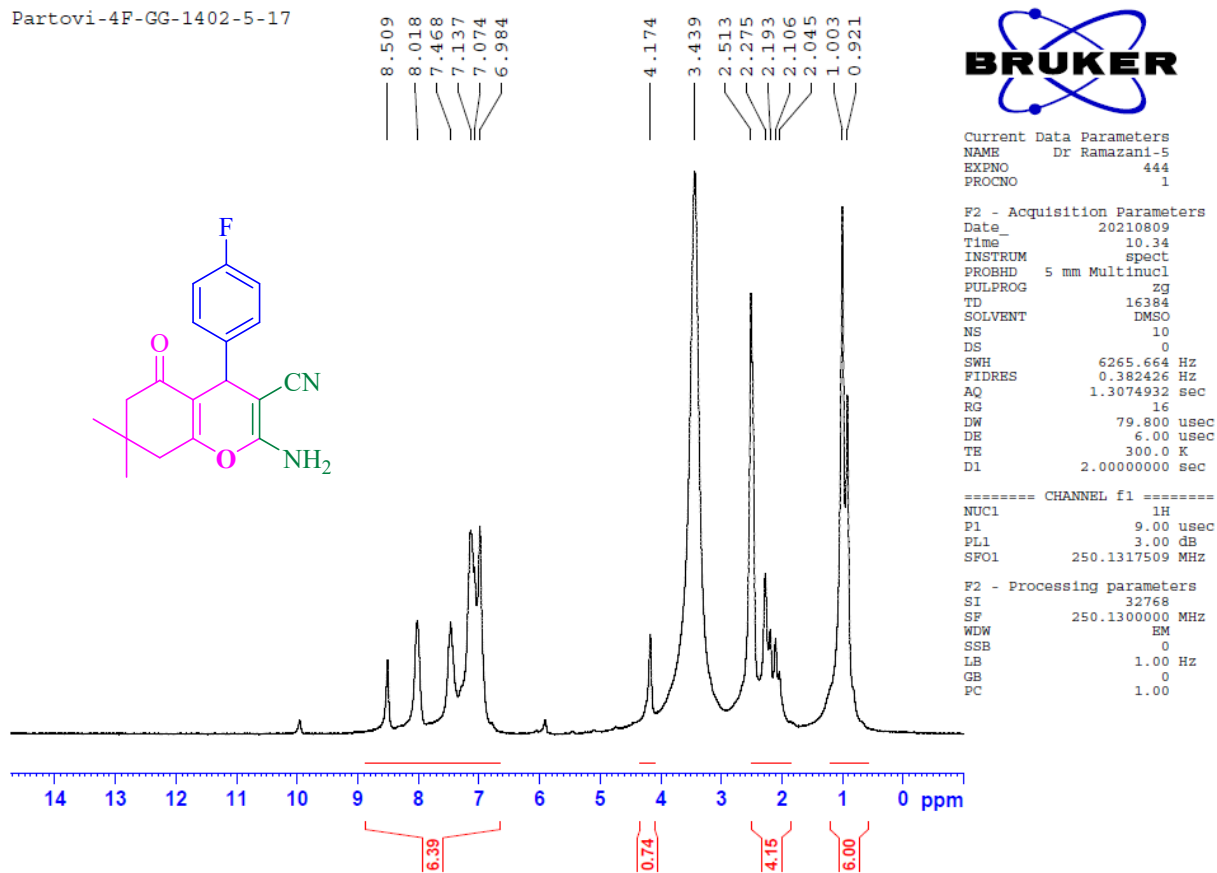

**Figure S14.**  $^1\text{H}$  NMR spectrum of 2-Amino-7,7-dimethyl-4-(4-fluorophenyl)-5-oxo-5,6,7,8-tetrahydrobenzo[b]pyran (4h)

Partovi-4F-GG-1402-5-17

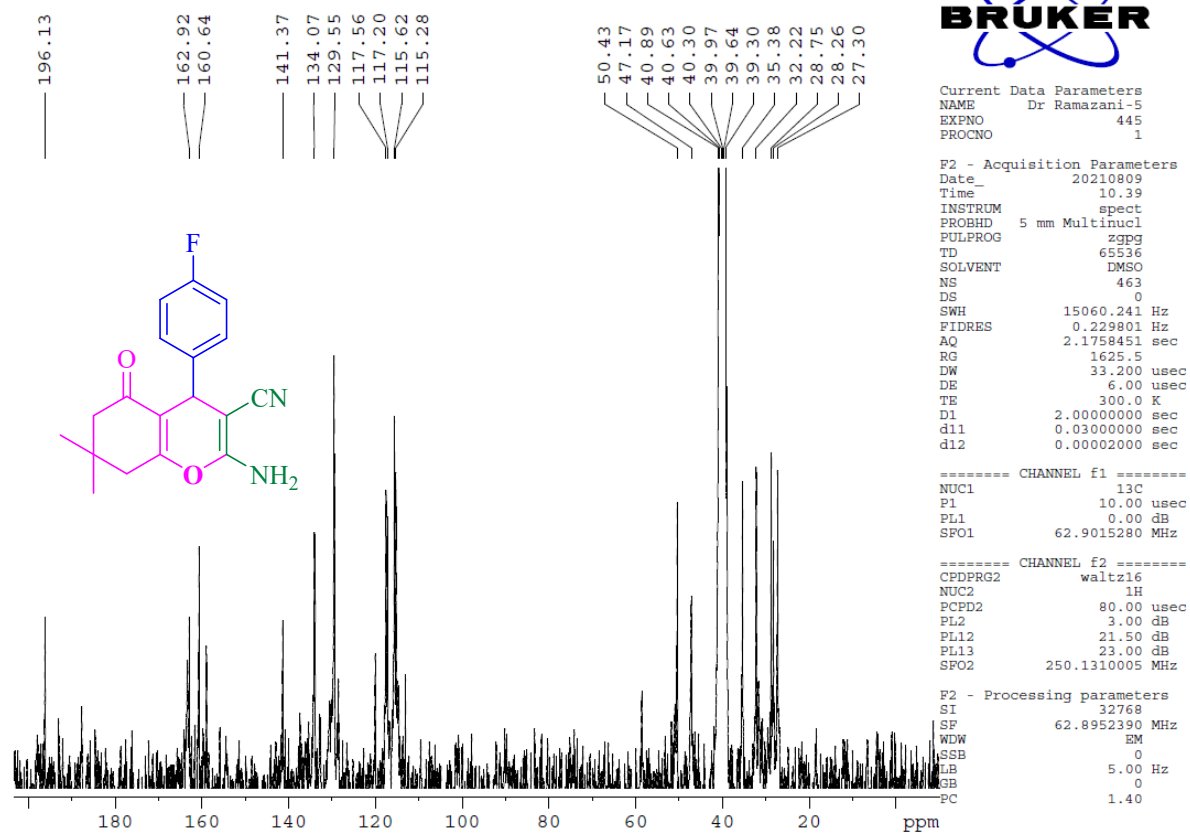

**Figure S15.** <sup>13</sup>C NMR spectrum of 2-Amino-7,7-dimethyl-4-(4-fluorophenyl)-5-oxo-5,6,7,8-tetrahydrobenzo[b]pyran (4h)

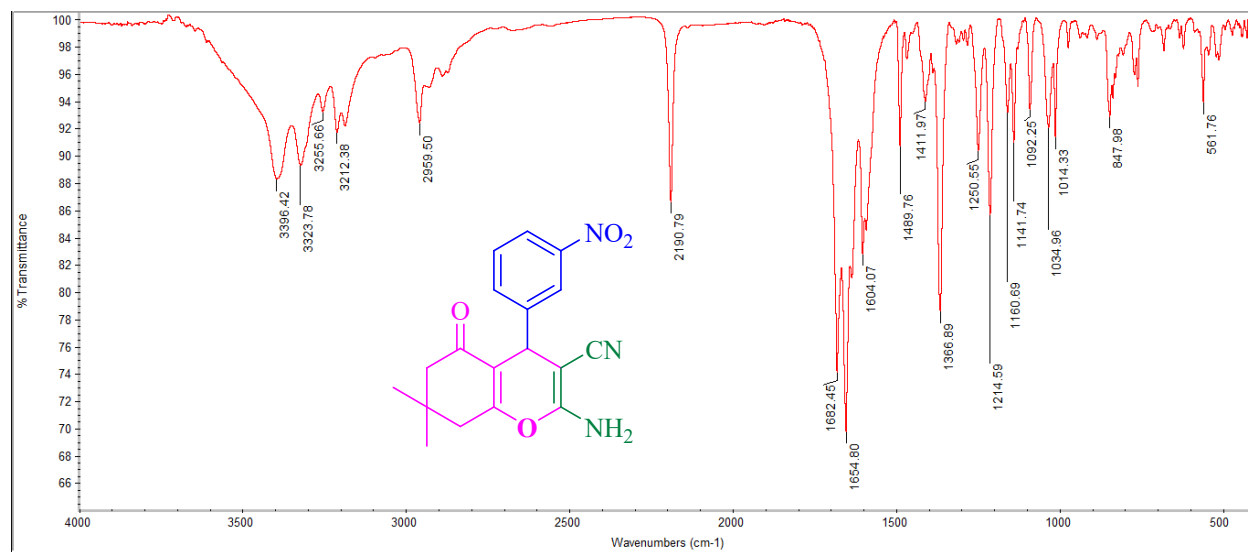

**Figure S16.** FT-IR spectrum of 2-Amino-7,7-dimethyl-4-(3-nitrophenyl)-5-oxo-5,6,7,8-tetrahydrobenzo[b]pyran (4m)

partovi-3NG6-1402-5-9

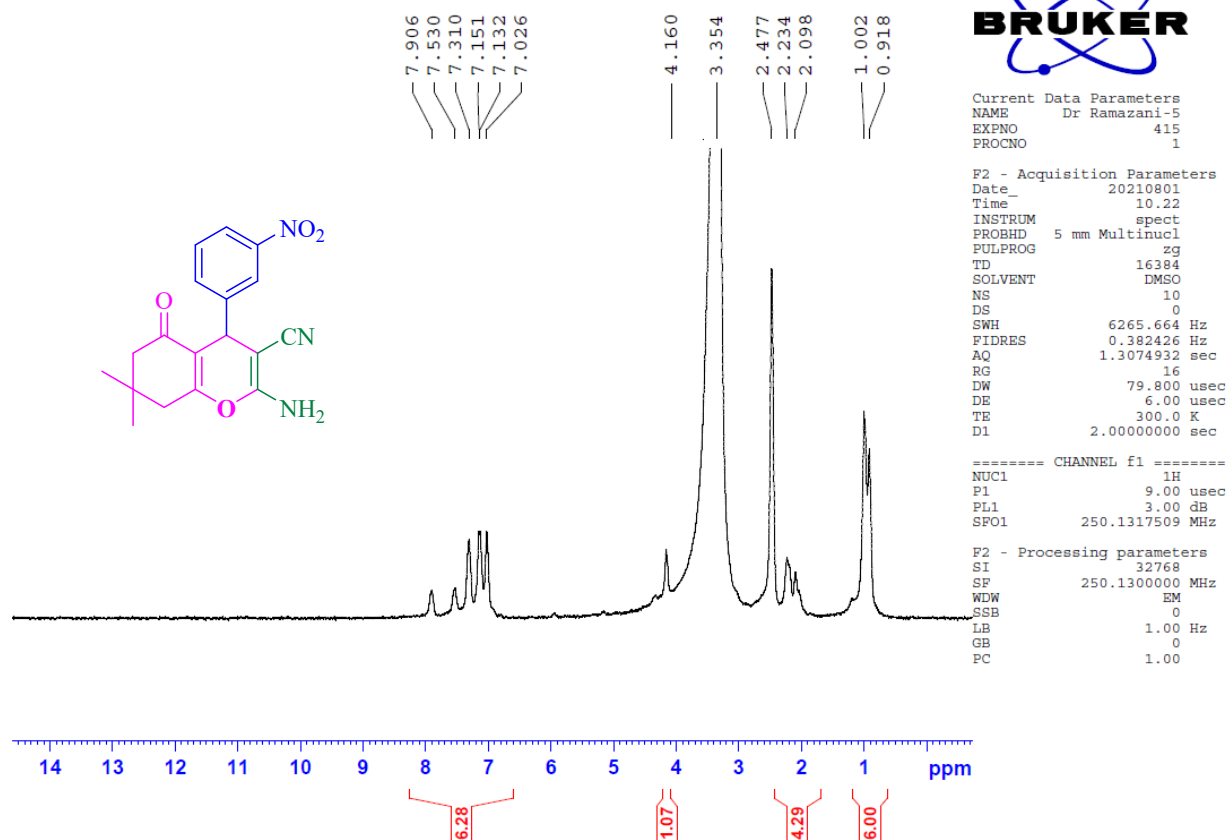

**Figure S17.**  $^1\text{H}$  NMR spectrum of 2-Amino-7,7-dimethyl-4-(3-nitrophenyl)-5-oxo-5,6,7,8-tetrahydrobenzo[b]pyran (4m)

Partovi-4-meto-G

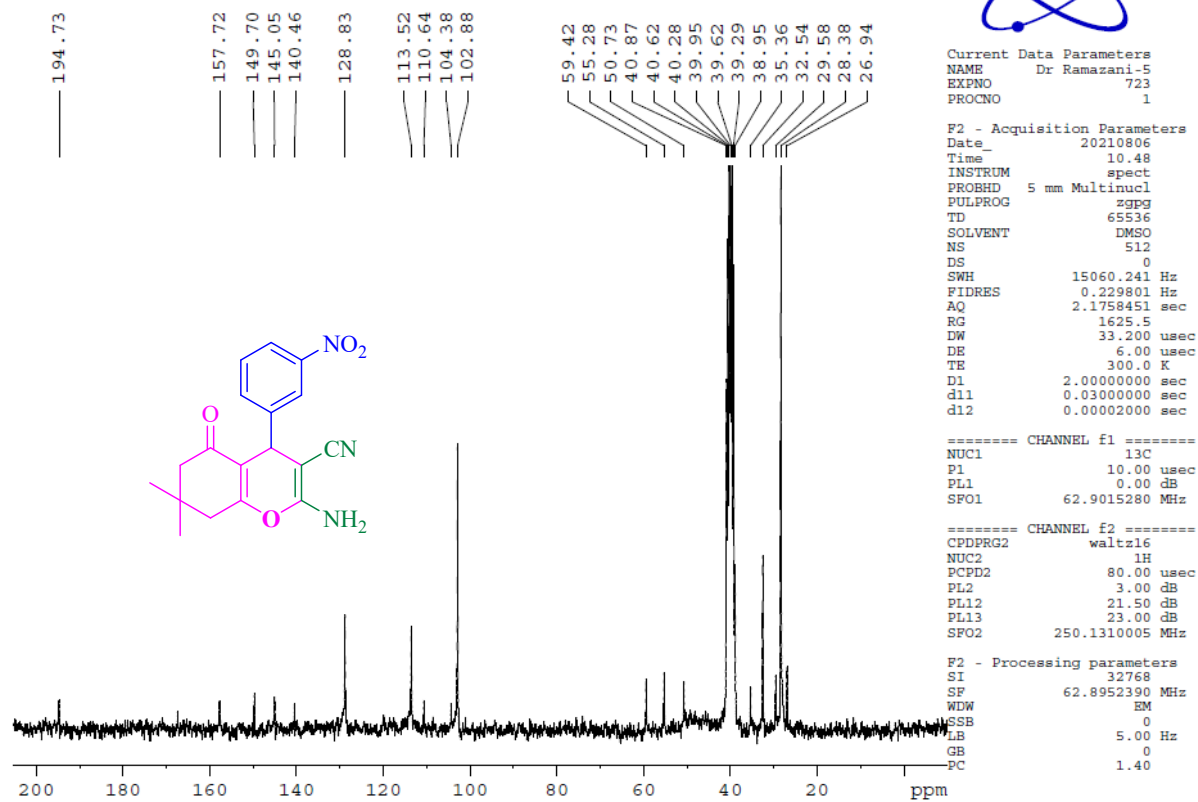

**Figure S18.**  $^{13}\text{C}$  NMR spectrum of 2-Amino-7, 7-dimethyl-4-(3-nitrophenyl)-5-oxo-5, 6, 7, 8-tetrahydrobenzo[b]pyran (4m)

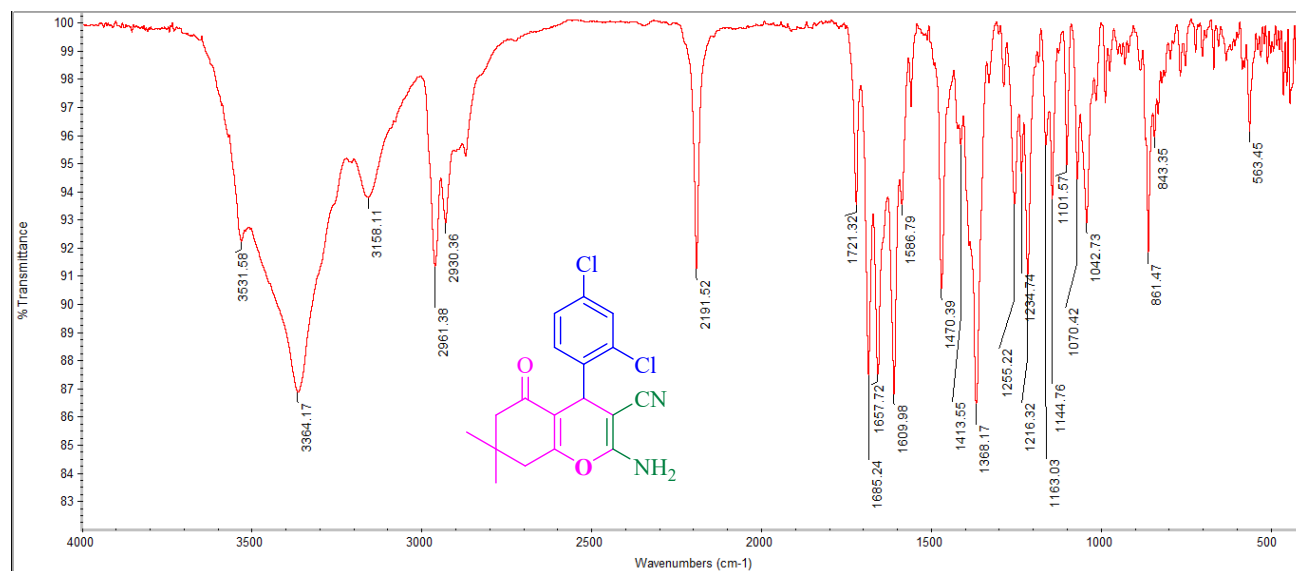

**Figure S19.** FT-IR spectrum of 2-Amino-7,7-dimethyl-4-(2,4-dichlorophenyl)-5-oxo-5,6,7,8-tetrahydrobenzo[b]pyran (4o)



partovi-2-6-dicl-G

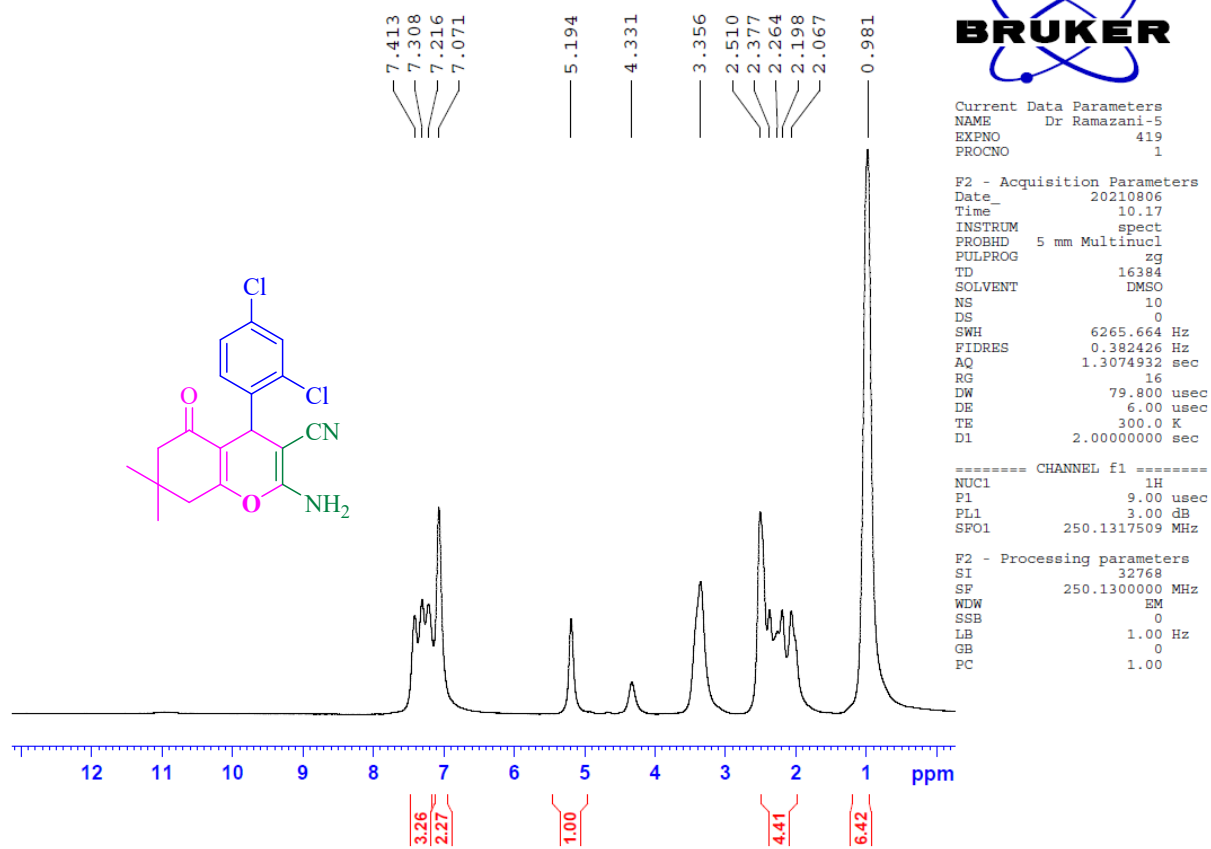

**Figure S20.**  $^1\text{H}$  NMR spectrum of 2-Amino-7,7-dimethyl-4-(2,4-dichlorophenyl)-5-oxo-5,6,7,8-tetrahydrobenzo[b]pyran (4o)

partovi-2-6diclG

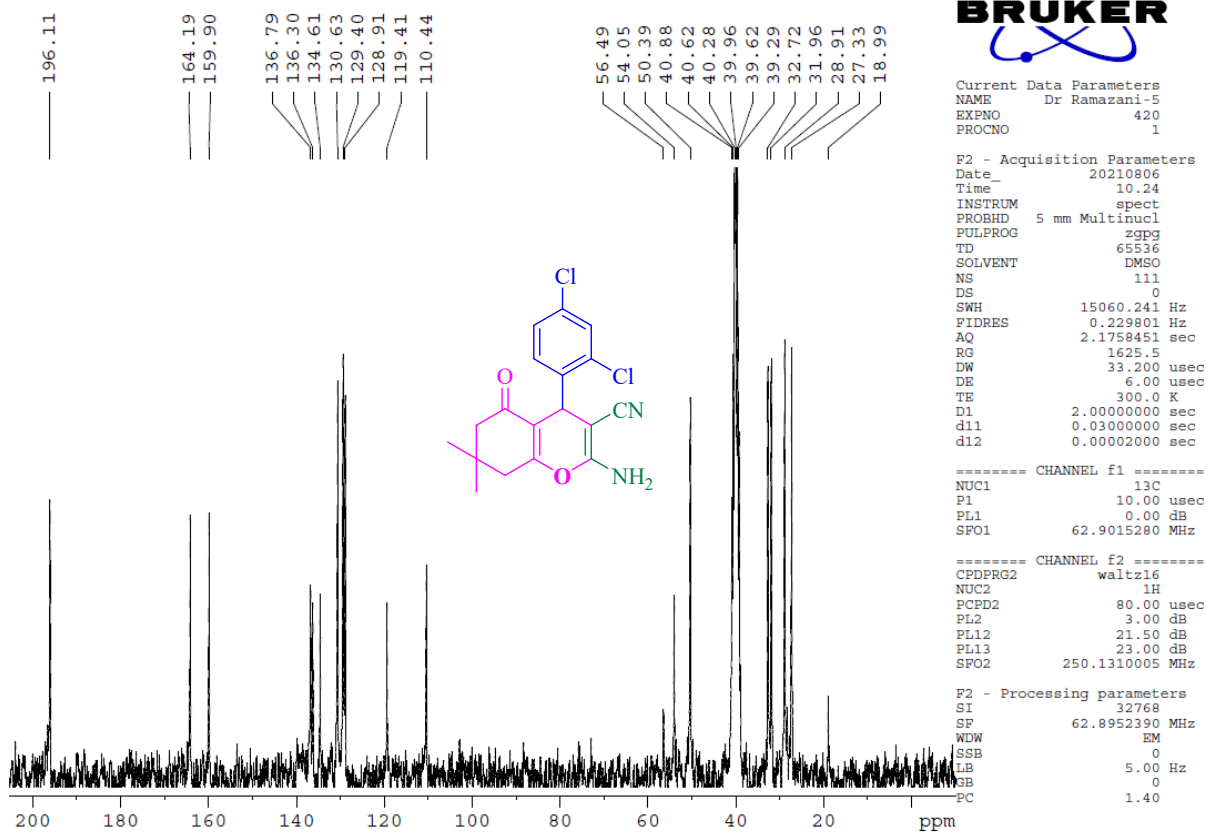

**Figure S21.**  $^{13}\text{C}$  NMR spectrum of 2-Amino-7,7-dimethyl-4-(2,4-dichlorophenyl)-5-oxo-5,6,7,8-tetrahydrobenzo[b]pyran (4o)
